## Corrigendum

**O'Brochta, D. A., Sethuraman, N., Wilson, R., Hice, R. H., Pinkerton, A. C., Levesque, C. S., Bideshi, D. K., Jasinskiene, N., Coates, C. J., James, A. A., Lehane, M. J. and Atkinson, P. W.** (2003). Gene vector and transposable element behavior in mosquitoes. *J. Exp. Biol.* **206**, 3823-3834.

A paper by Adelman et al. was incorrectly cited in the text and Reference list as 'in press' in *Genetics*. The article has actually been submitted elsewhere.

The authors apologise for any inconvenience this may have caused.
